# Supplementary material for: Layered rare-earth hydroxide nanocones with facile host composition modification and anion-exchange feature: topotactic transformation into oxide nanocones for upconversion
Source: Royal Society of Chemistry journal article supplement (doi:10.1039/c7nr02001e), 2017-01-01
Supplement: c7nr02001e1.pdf [file c7nr02001e1.pdf]

## *Supporting Information*

### **Layered Rare-earth Hydroxide Nanocones with Facile Host Composition Modification and Anion-exchange Feature: Topotactic Transformation into Oxide Nanocones for Upconversion**

Yishun Zhong,<sup>†,‡,¶</sup> Gen Chen,<sup>†,¶</sup> Xiaohe Liu,<sup>†,‡,\*</sup> Dan Zhang,<sup>‡</sup> Ning Zhang,<sup>†</sup> Junhui Li,<sup>§</sup> Shuquan Liang,<sup>†</sup> Renzhi Ma,<sup>⊥,\*</sup> Guanzhou Qiu<sup>‡</sup>

<sup>†</sup> State Key Laboratory of Powder Metallurgy and School of Materials Science and Engineering, Central South University, Changsha, Hunan 410083, P. R. China. E-mail: liuxh@csu.edu.cn

<sup>‡</sup> School of Minerals Processing and Bioengineering, Central South University, Changsha, Hunan 410083, P. R. China.

<sup>§</sup> School of Mechanical and Electrical Engineering, Central South University, Changsha, Hunan 410083, P. R. China.

<sup>⊥</sup> International Center for Materials Nanoarchitectonics (MANA), National Institute for Materials Science (NIMS), Namiki 1-1, Tsukuba, Ibaraki 305-0044, Japan. E-mail: MA.Renzhi@nims.go.jp

<sup>¶</sup> These authors contributed equally to this work.

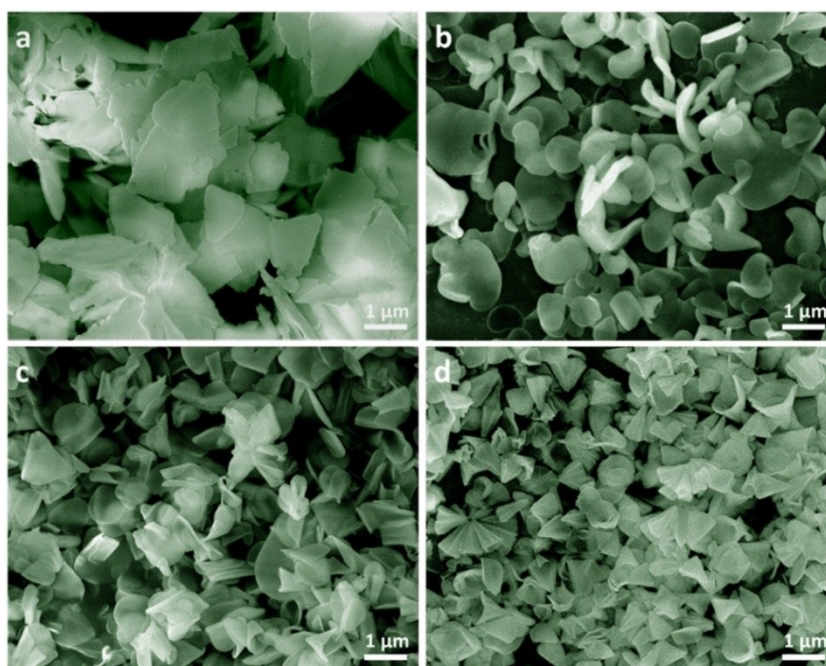

**Figure S1** SEM images of as-prepared LYH obtained using different amounts of surfactants. (a) 0 mmol SDS; (b) 0.605 mmol SDS; (c) 1.21 mmol SDS; (d) 2.42 mmol SDS.

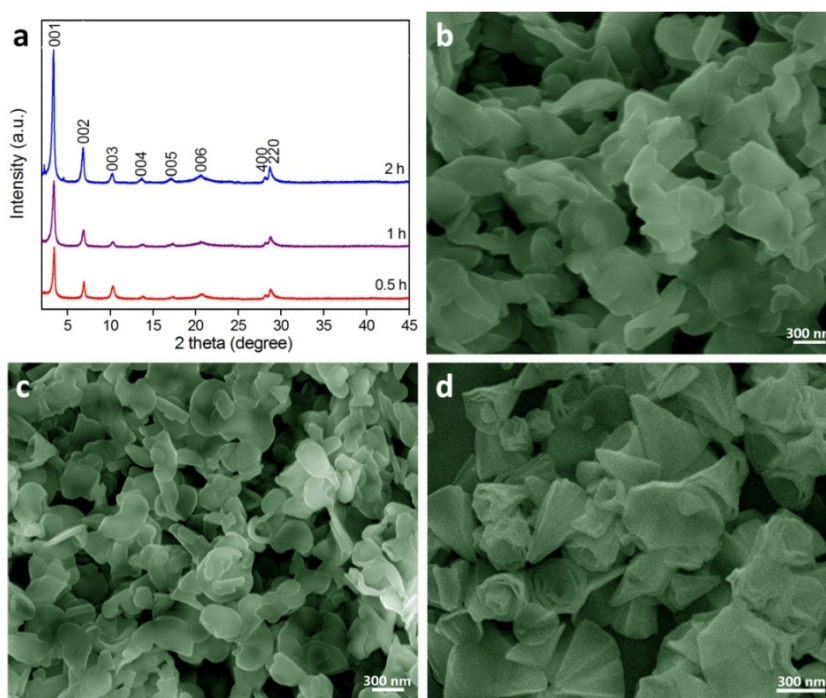

**Figure S2** a) XRD patterns of  $\text{DS}^-$ -intercalated LYH obtained at 140 °C for different time. SEM images of as-prepared LYH obtained at 140 °C for different time: b) 0.5 h; c) 1 h; d) 2 h.

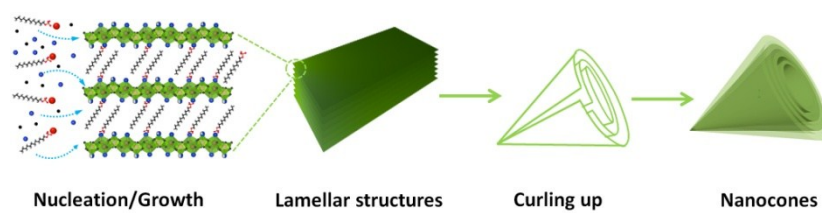

**Figure S3** Schematic illustration of the formation mechanism of LYH NCs.

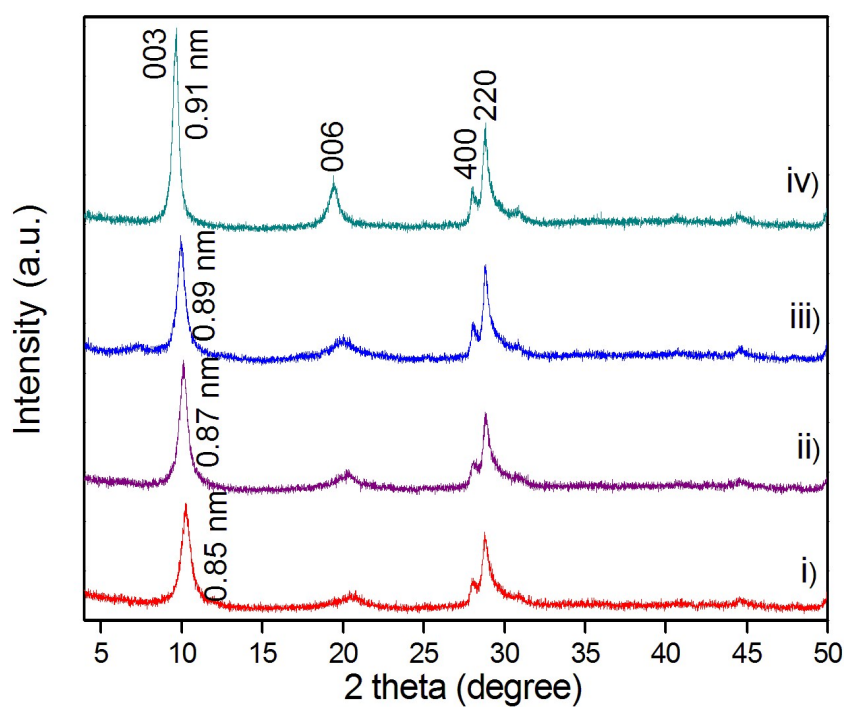

**Figure S4** XRD patterns of LYH NCs in  $\text{NaNO}_3$  solution with different relative humidity: i) 34 %, ii) 56 %, iii) 81 %, iv) 100 %.

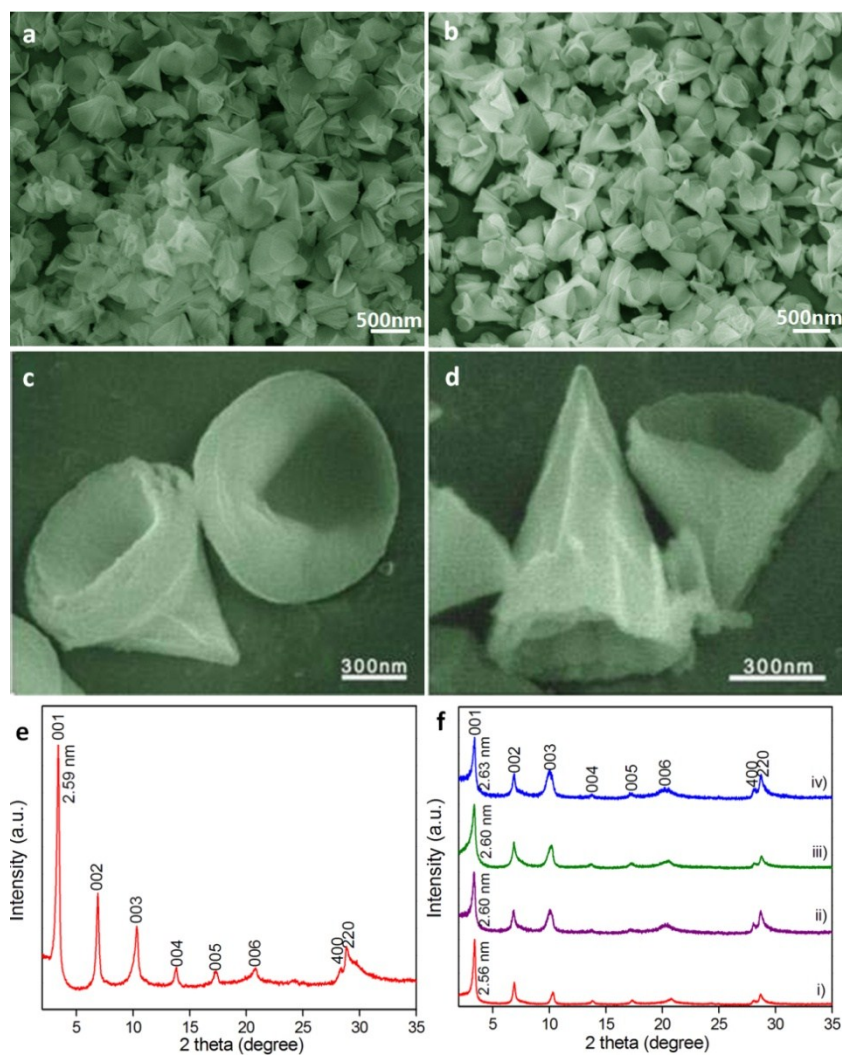

**Figure S5** SEM images of LRH NCs: (a)  $Y_{0.8}Tb_{0.2}$ ; (b)  $Y_{0.6}Tb_{0.4}$ ; (c) Tb; (d) Er. (e) XRD pattern of layered Er hydroxide. (f) XRD patterns of layered Y-Er-Yb hydroxide at various ratios: i)  $Y_{0.99}Er_{0.01}$ ; ii)  $Y_{0.98}Er_{0.01}Yb_{0.01}$ ; iii)  $Y_{0.94}Er_{0.01}Yb_{0.05}$ ; iv)  $Y_{0.89}Er_{0.01}Yb_{0.10}$ .

**Table S1.** The elements of Y, Yb and Er analyzed by ICP-OES.

| Samples designed (mol%)                                  | Elements         | Y    | Yb   | Er   |
|----------------------------------------------------------|------------------|------|------|------|
| Y <sub>2</sub> O <sub>3</sub> :1%Yb/1%Er<br>(98, 1, 1)   | Measured (wt. %) | 70.4 | 1.74 | 1.17 |
|                                                          | Analyzed (mol%)  | 98.3 | 0.92 | 0.88 |
| Y <sub>2</sub> O <sub>3</sub> :5%Yb/1%Er<br>(94, 5, 1)   | Measured (wt. %) | 63.9 | 8.31 | 1.15 |
|                                                          | Analyzed (mol%)  | 92.9 | 6.1  | 1    |
| Y <sub>2</sub> O <sub>3</sub> :10%Yb/1%Er<br>(89, 10, 1) | Measured (wt. %) | 59.1 | 14.6 | 1.35 |
|                                                          | Analyzed (mol%)  | 87.8 | 11.1 | 1.1  |
